# Supplementary material for: Is Mg-stabilized amorphous calcium carbonate a homogeneous mixture of amorphous magnesium carbonate and amorphous calcium carbonate?
Source: Royal Society of Chemistry journal article supplement (doi:10.1039/c6cc04522g), 2016-01-01
Supplement: c6cc04522g1.pdf [file c6cc04522g1.pdf]

# Supporting Information

Is Mg-Stabilized Amorphous Calcium Carbonate a Homogeneous  
Mixture of Amorphous Magnesium Carbonate and Amorphous Calcium  
Carbonate?

Sheng-Yu Yang,<sup>1</sup> Hsun-Hui Chang,<sup>1</sup> Cang-Jie Lin,<sup>1</sup> Shing-Jong Huang,<sup>2</sup> and Jerry C.  
C. Chan<sup>1\*</sup>

<sup>1</sup>Department of Chemistry and <sup>2</sup>Instrumentation Center, National Taiwan University,

No. 1, Section 4, Roosevelt Road, Taipei 106, Taiwan.

## Content

1. Experimental Method
2. Figures
3. Tables
4. References

## 1. Experimental Method

**Sample Preparation and Characterization.**  $^{13}\text{C}$ -enriched anhydrous  $\text{Na}_2\text{CO}_3$  (99.5%) was obtained from Cambridge Isotope Laboratories (Andover, USA). All other chemicals were obtained from Acros and used as received, without further purification. Deionized (DI) water was purged with  $\text{N}_2$  gas before use. The samples of Mg0.6ACC were prepared as follows. The solution of  $\text{CaCl}_2$  (62.5 mM) and  $\text{MgCl}_2$  (37.5 mM) was adjusted to the designated pH using aqueous sodium hydroxide (1 M). The  $^{13}\text{C}$ -enriched  $\text{Na}_2\text{CO}_3$  solution (100 mM) was buffered with  $\text{NH}_3/\text{NH}_4\text{Cl}$  (1 M) to attain the same pH. The solutions were transferred to two syringes connected to a YSP-101 syringe pump of YMC (Kyoto, Japan). A volume of 5 mL of the  $\text{Mg}^{2+}/\text{Ca}^{2+}$  solution was then mixed with 5 mL of the carbonate solution at 4 °C in a YMC microreactor with a volume of 1.2  $\mu\text{L}$ . The flow rate of the reactor was adjusted to 1 mL/min. After discarding the first 0.3 mL of the mixture, the subsequent 8 mL of the mixture was collected in precooled acetone. Precipitates were collected by repeatedly conducting centrifugation (6800 g for 5 min) and washing with precooled ethanol and acetone. The samples were lyophilized and stored in a desiccator. The residual solution mixture (1.7 mL) was collected for pH measurement. The same procedure was repeated with the solution of  $\text{CaCl}_2$  (16.7 mM) and  $\text{MgCl}_2$  (83.5 mM) for the preparation of the Mg5ACC samples. The samples with isotope enrichment were prepared for the NMR measurements only. All other characterizations were conducted for the natural-abundance samples. Pure ACC and AMC were prepared similarly at pH 8.75 without adding the ammonia buffer.

SEM images were taken on a Hitachi S-4800 field emission scanning electron microscope. The EDX analysis was performed on a LEO 1530 field emission scanning electron microscope equipped with EDX accessories. The ICP-MS

measurements were performed on an Agilent 7500ce system. The standard solutions of 1000 mg/L  $\text{Ca}^{2+}$  and  $\text{Mg}^{2+}$  (Merck) were diluted into ppb levels for the calibration measurements.

**Solid-State NMR.** All SSNMR experiments were carried out at  $^{13}\text{C}$  and  $^1\text{H}$  frequencies of 100.72 and 400.13 MHz, respectively, on a Bruker Avance III spectrometer equipped with commercial 2.5 mm probe.  $^{13}\text{C}$  chemical shift were externally referenced with adamantane as the secondary reference. MAS frequency was 12.5 kHz and the measurement were conducted with sample temperature maintained at 273 K. For  $^{13}\text{C}$  direct excitation (Bloch decay) experiments, the recycle delay was set to 120 s. For the  $^{13}\text{C}\{^1\text{H}\}$  cross-polarization experiments, the  $^1\text{H}$  nutation frequency was set to 50 kHz and that of  $^{13}\text{C}$  was ramped linearly through the Hartmann-Hahn matching condition. Two pulse phase modulation (TPPM) proton decoupling of 75 kHz was applied during the acquisition period. The 2D  $^{13}\text{C}$  homonuclear correlation was carried out based on proton-driven spin diffusion (PDSO).<sup>1</sup> Quadrature detection in the F1 dimension was accomplished by the States-TPPI approach. For each  $t_1$  increment, 32 scans were accumulated and a total of 128 increments were acquired at steps of 320  $\mu\text{s}$ .

The  $^{13}\text{C}\{^1\text{H}\}$  heteronuclear correlation (HETCOR) spectrum was acquired under the conditions of frequency-switched Lee-Goldburg<sup>2</sup> (FSLG) irradiation during the  $t_1$  evolution to enhance the spectral resolution in the  $^1\text{H}$  dimension. The FSLG irradiation was achieved by setting the  $^1\text{H}$  decoupling field and the resonance offset at 100 and 70.71 kHz, respectively, so that the effective nutation frequency was equal to 122.5 kHz. The spectrum was acquired at a spin rate of 10 kHz. For each  $t_1$  increment, 256 transients were accumulated and a total of 47 increments were at steps of 75.53  $\mu\text{s}$ .

The spin-diffusion experiments were carried using the pulse sequence shown in Figure S13. The contact time for the CP was set to 0.5 ms to selectively enhance the  $^{13}\text{C}$  polarization of the bicarbonate phase. The spin diffusion time,  $t_{\text{SD}}$ , was varied from 0.1 to 16 s. The spin-diffusion data were analyzed based on the following coupled differential equations:

$$\begin{aligned} dI^{\text{HCO}_3^-}/dt &= -\left(I^{\text{HCO}_3^-} - I_{\text{eq}}^{\text{HCO}_3^-}\right)/\tau_{\text{SD}} + \left(I^{\text{CO}_3^{2-}} - I_{\text{eq}}^{\text{CO}_3^{2-}}\right)/\tau_{\text{SD}} \\ dI^{\text{CO}_3^{2-}}/dt &= -\left(I^{\text{CO}_3^{2-}} - I_{\text{eq}}^{\text{CO}_3^{2-}}\right)/\tau_{\text{SD}} + \left(I^{\text{HCO}_3^-} - I_{\text{eq}}^{\text{HCO}_3^-}\right)/\tau_{\text{SD}} \end{aligned}$$

under the constraint that  $I^{\text{HCO}_3^-} + I^{\text{CO}_3^{2-}} = 1$ , which essentially requires that each signal must be normalized by the signal sum at the corresponding mixing time. With this procedure, we find that the spin-lattice relaxation times of the two mineral phases, which could be very different, will only affect the quasi-equilibrium distribution of the spin polarizations of the carbonate and the bicarbonate signals but not the  $\tau_{\text{SD}}$  values.<sup>3</sup>

## 2. Figures

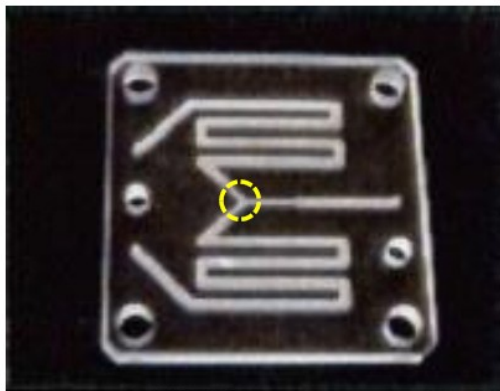

**Figure S1..** Glass device (KC-M-Y-G, YMC) used for mixing of the stock solutions. The physical size of the device is  $30 \times 30 \times 3.2$  mm. The total volume before mixing is  $14 \mu\text{L}$  and the mixing chamber (highlighted by the dashed circle) has a volume of  $1.2 \mu\text{L}$ . The channel has a cross section of  $0.5 \times 0.1$  mm.

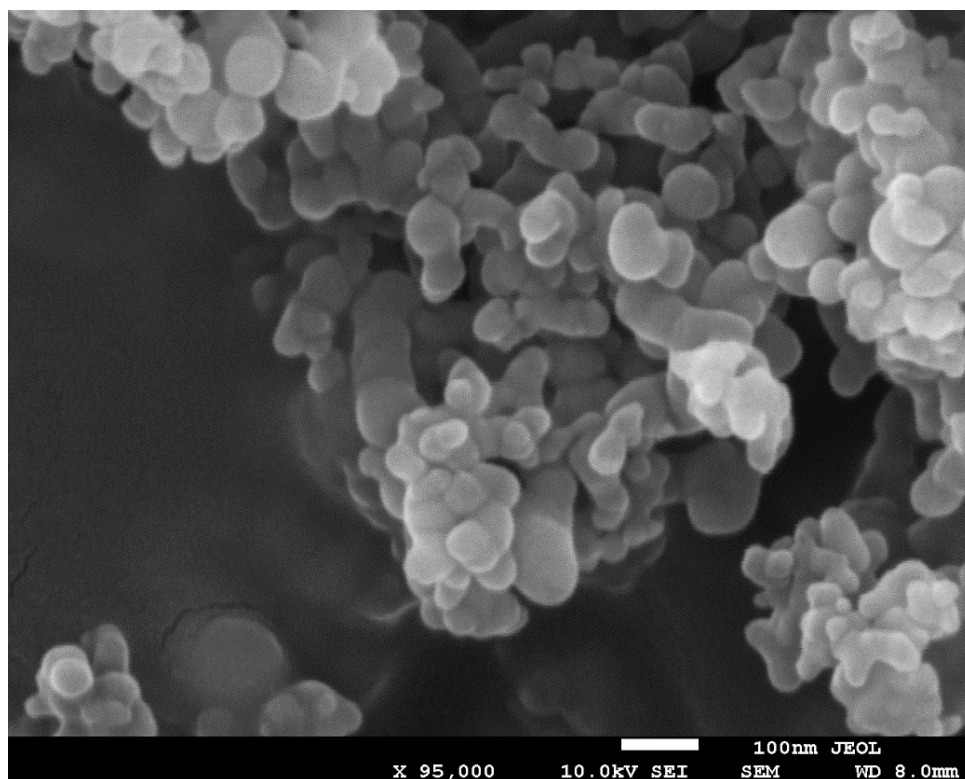

**Figure S2..** Typical SEM image obtained for MgXACC samples. The mean diameter of the spherical species is in the vicinity of 50 nm.

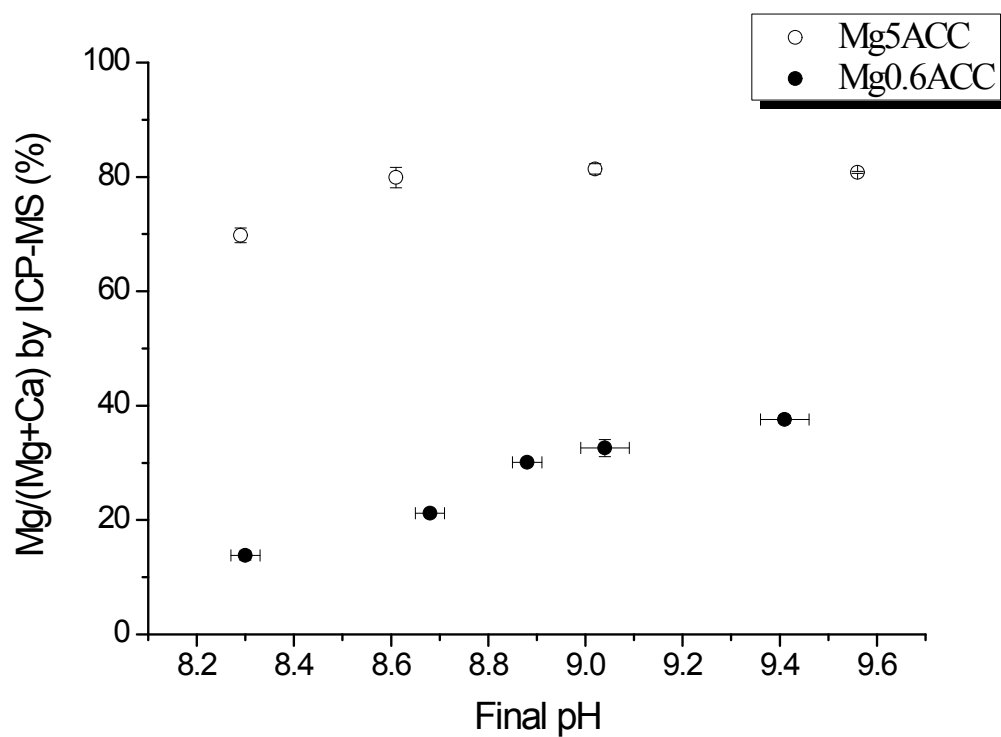

**Figure S3..** Mg content of samples Mg5ACC and Mg0.6ACC vs the final pH of the solution mixture.

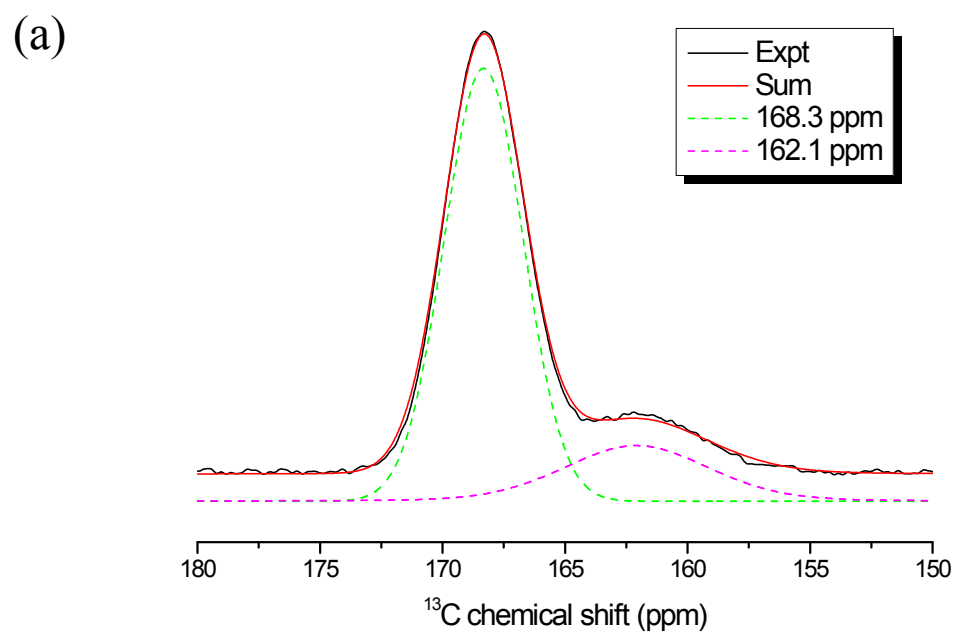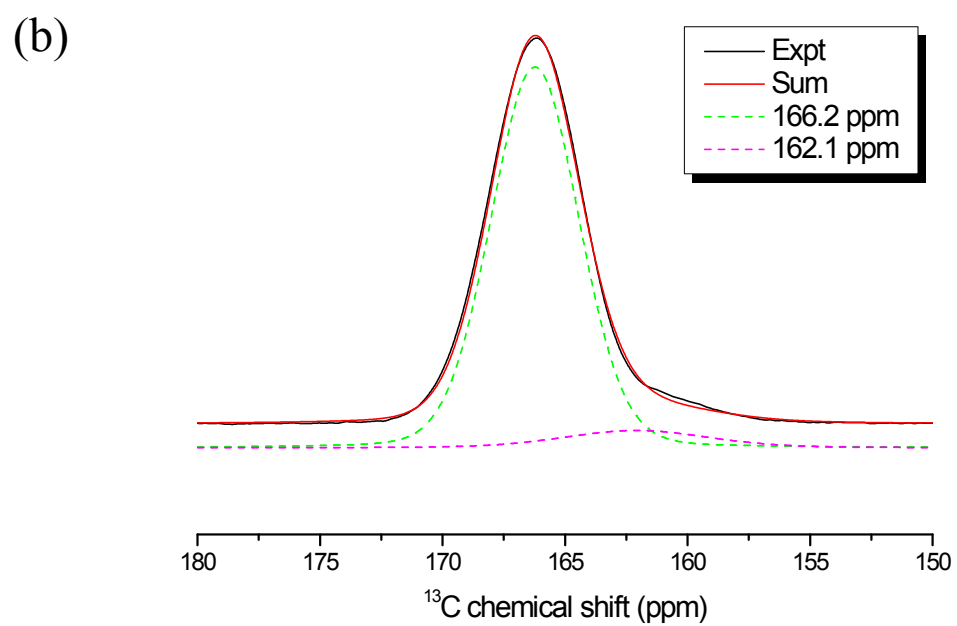

**Figure S4..**  $^{13}\text{C}\{^1\text{H}\}$  CPMAS spectra for **(a)** pure ACC and **(b)** pure AMC, from which the chemical shifts and line widths of the spectral components at 168.3, 166.2, and 162.1 ppm were determined by deconvolution.

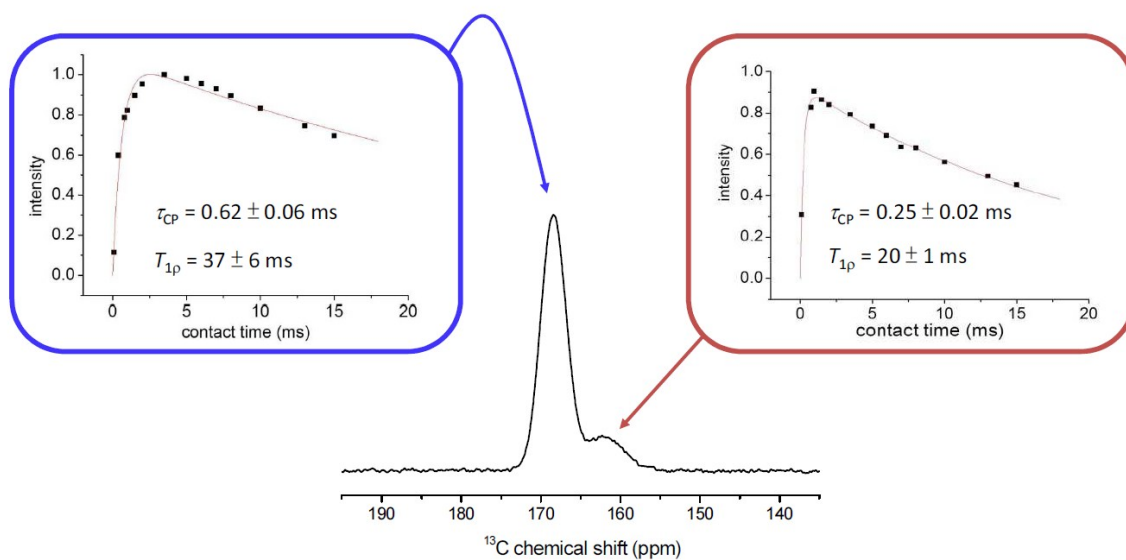

**Figure S5..** Typical  $^{13}\text{C}\{^1\text{H}\}$  variable contact-time CPMAS data obtained for Mg-ACC. The shoulder peak was assigned to  $\text{HCO}_3^-$  based on its relatively short  $\tau_{\text{CP}}$  (0.25 ms), where the data were analyzed by

$$I(t) = I_0 \left[ 1 - \exp(-t/\tau_{\text{CP}}) \right] \exp(-t/T_{1\rho}).$$

Note that the bicarbonate component was not observed for MgXACC prepared at high pH.<sup>4</sup>



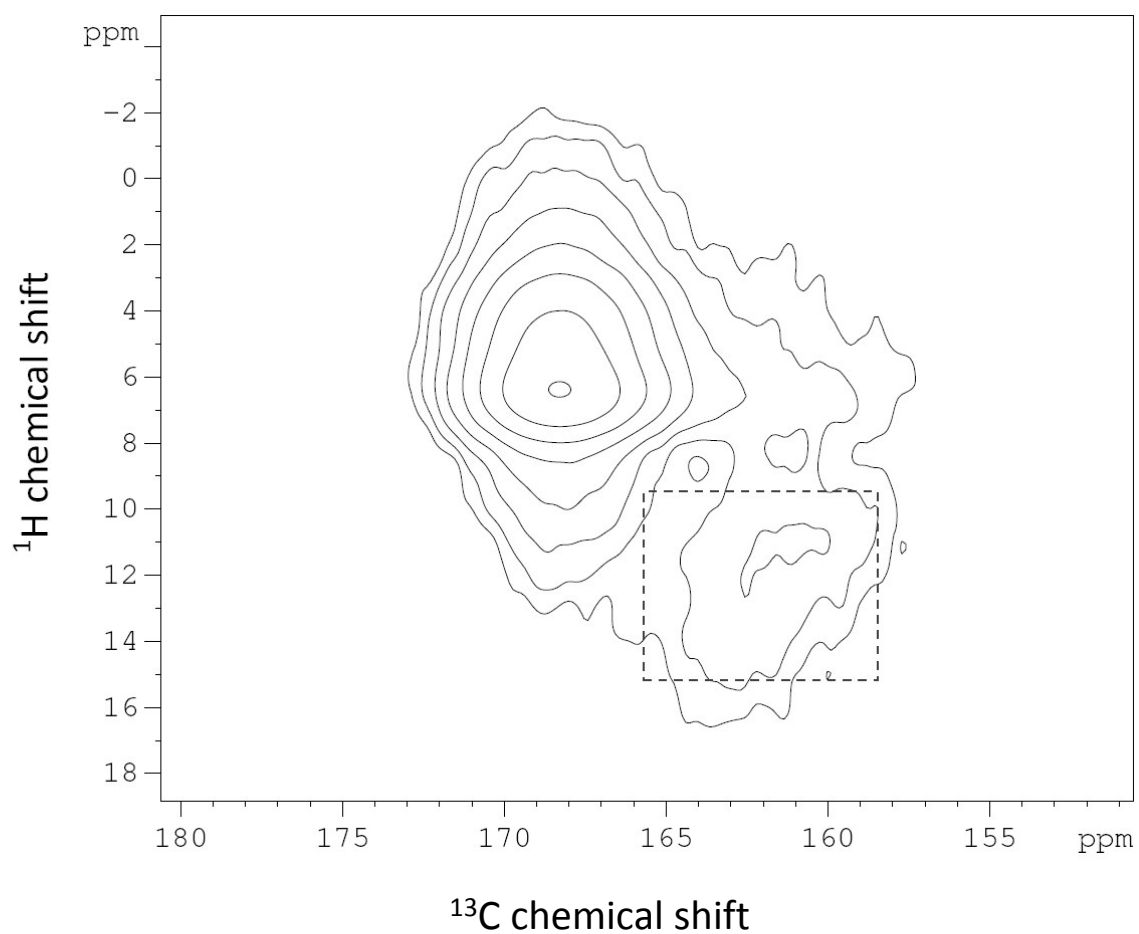

**Figure S6..**  $^{13}\text{C}\{^1\text{H}\}$  **FSLG**-HETCOR spectrum obtained for  $\text{Mg}_{0.6}\text{ACC}$  prepared at pH 8.30. The correlation peak highlighted by the rectangular dashed region, which centered at 12 and 162 ppm of the  $^1\text{H}$  and  $^{13}\text{C}$  dimensions, respectively, provided a compelling evidence for the existence of bicarbonate species.<sup>5</sup> The contour levels were increased by a factor 1.8 successively, where the base levels were set to  $3.0 \times \text{root-mean-square noise}$ .

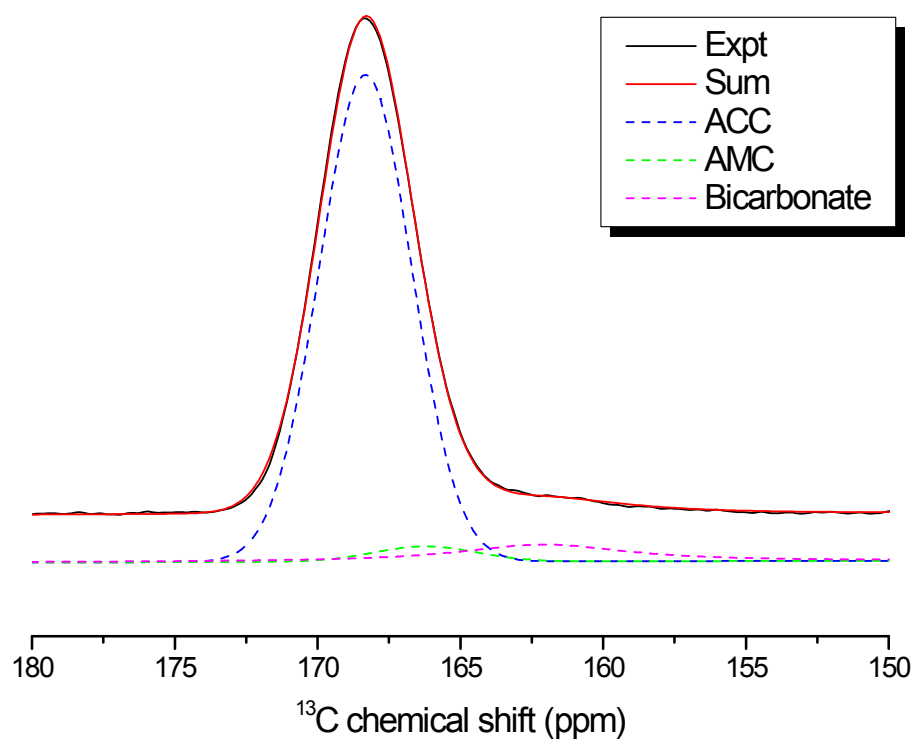

**Figure S7..**  $^{13}\text{C}$  MAS spectrum obtained for  $\text{Mg}_{0.6}\text{ACC}$  prepared at pH 8.30.

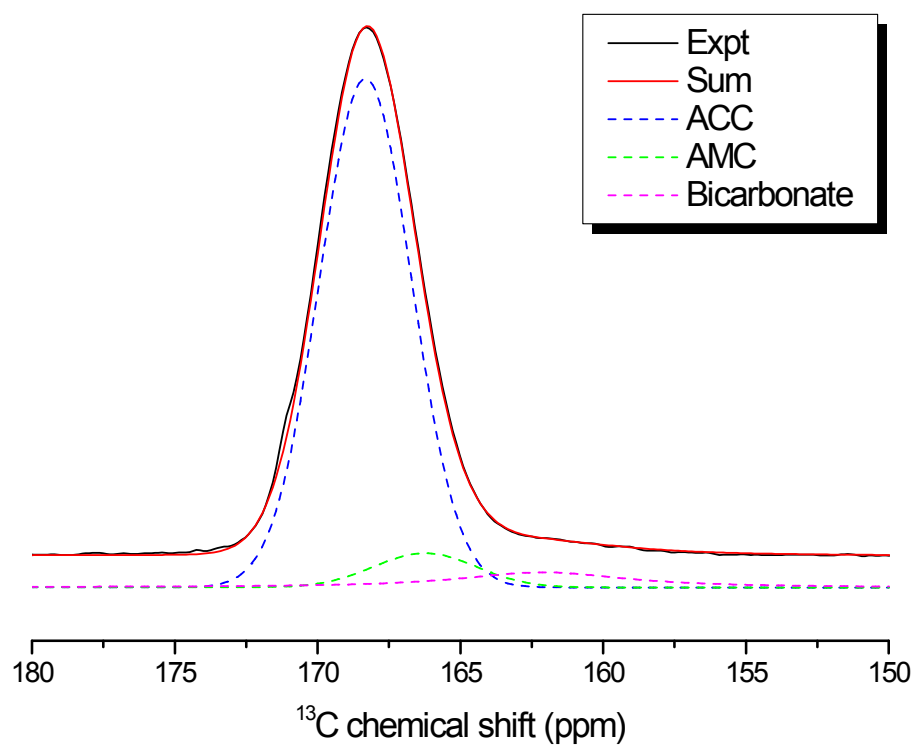

**Figure S8..**  $^{13}\text{C}$  MAS spectrum obtained for Mg0.6ACC prepared at pH 8.68.

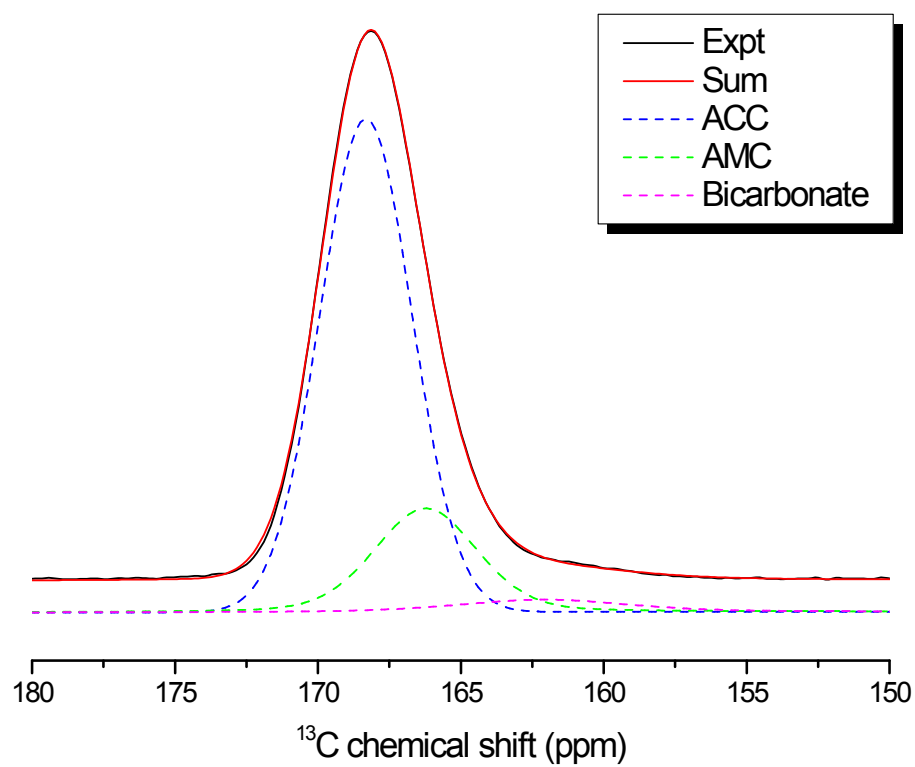

**Figure S9..**  $^{13}\text{C}$  MAS spectrum obtained for Mg0.6ACC prepared at pH 8.88.

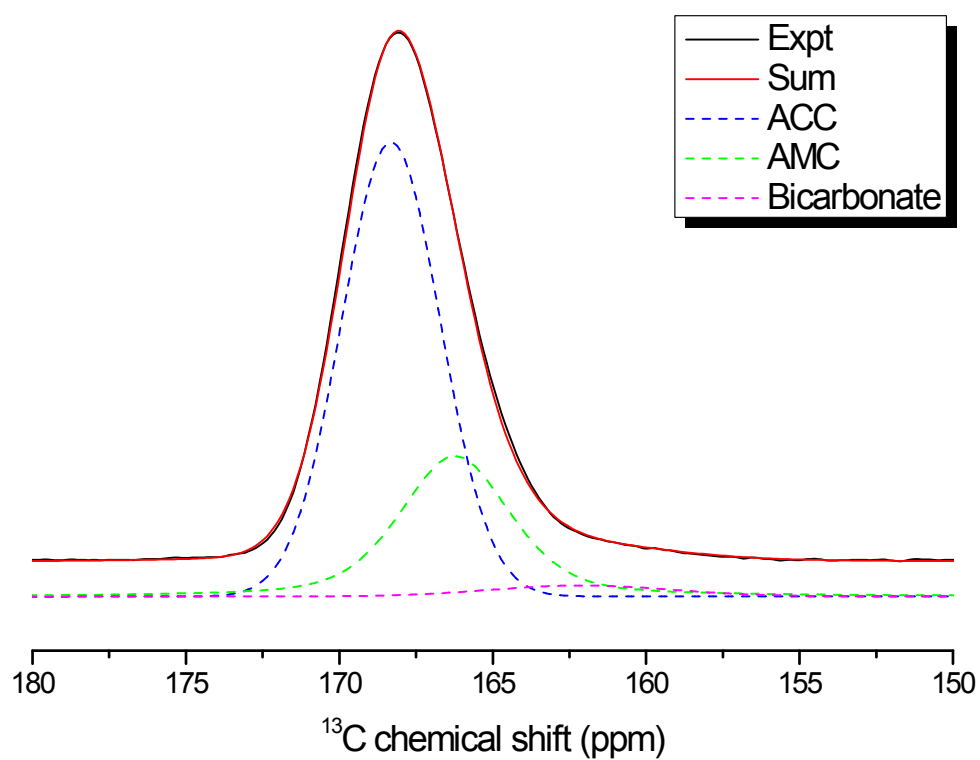

**Figure S10..**  $^{13}\text{C}$  MAS spectrum obtained for  $\text{Mg}_{0.6}\text{ACC}$  prepared at pH 9.04.

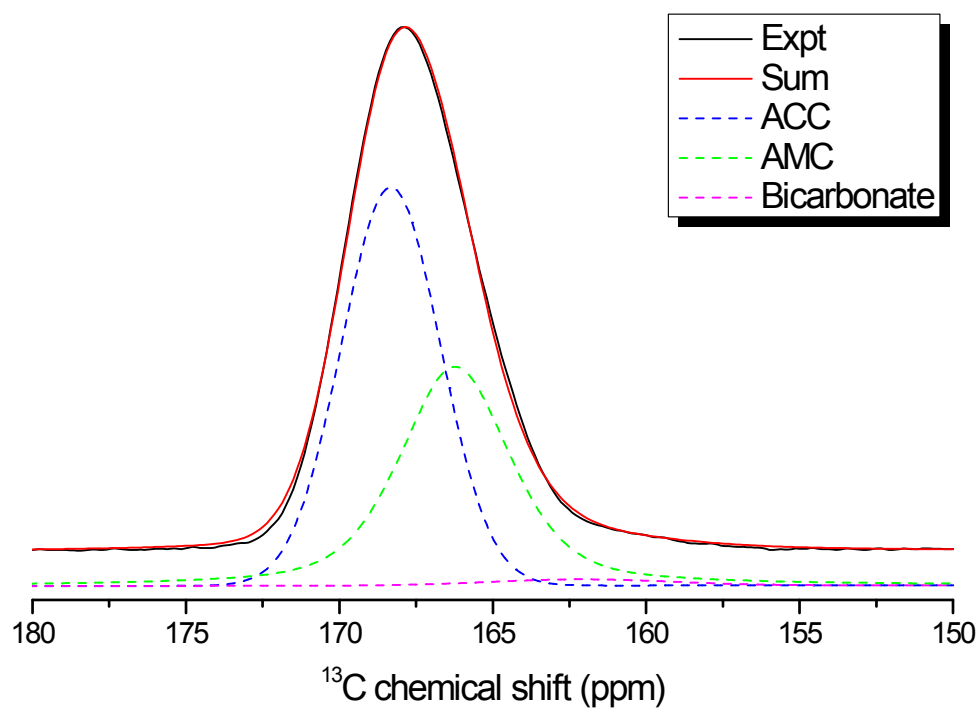

**Figure S11..**  $^{13}\text{C}$  MAS spectrum obtained for  $\text{Mg}_{0.6}\text{ACC}$  prepared at pH

9.41.

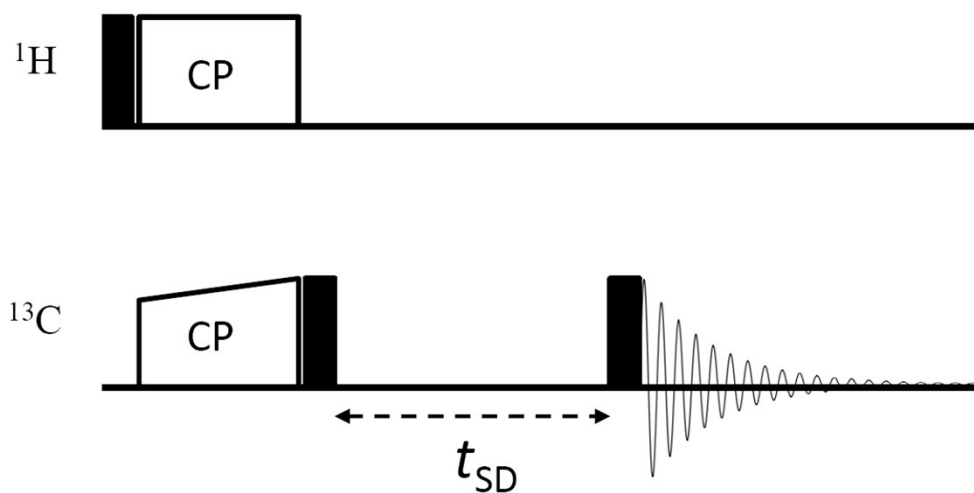

**Figure S12..** Pulse sequence employed for the spin diffusion experiments.

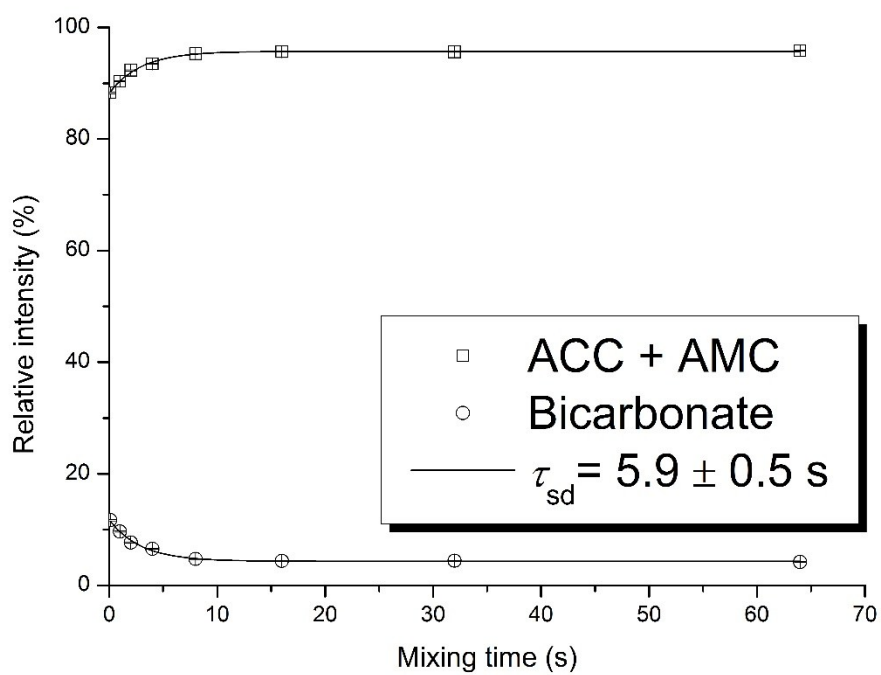

**Figure S13..**  $^{13}\text{C}$  spin diffusion results obtained for  $\text{Mg}_{0.6}\text{ACC}$

prepared at pH 8.30. The data analysis was carried out as described in the experimental section. The error bars are smaller than the symbol size.

### 3. Tables

**Table S1.** Summary of the initial pH of the  $\text{Mg}^{2+}/\text{Ca}^{2+}$ , the final pH after mixing in the micromixer, the Mg content of the MgXACC samples.

| Sample   | Initial pH <sup>1</sup> | Final pH <sup>1</sup> | Mg content<br>ICP-MS <sup>2</sup><br>(%) | Mg content<br>SEM-EDX <sup>3</sup><br>(%) |
|----------|-------------------------|-----------------------|------------------------------------------|-------------------------------------------|
| Mg0.6ACC | 9.65                    | 9.41 ± 0.05           | 38 ± 1                                   | 36 ± 9                                    |
|          | 9.20                    | 9.04 ± 0.05           | 33 ± 2                                   | 31 ± 8                                    |
|          | 9.00                    | 8.88 ± 0.03           | 30 ± 1                                   | 28 ± 3                                    |
|          | 8.75                    | 8.68 ± 0.03           | 21 ± 1                                   | 21 ± 4                                    |
|          | 8.30                    | 8.30 ± 0.03           | 14 ± 1                                   | 13 ± 2                                    |
| Mg5ACC   | 9.65                    | 9.56 ± 0.01           | 80.8 ± 0.2                               | 82 ± 4                                    |
|          | 9.20                    | 9.02 ± 0.10           | 81 ± 1                                   | 86 ± 6                                    |
|          | 8.75                    | 8.61 ± 0.09           | 80 ± 2                                   | 81 ± 7                                    |
|          | 8.30                    | 8.29 ± 0.08           | 70 ± 1                                   | 75 ± 4                                    |

<sup>1</sup> All the pH measurements were carried out at room temperature. <sup>2</sup> Errors were estimated based on measurements of different samples. <sup>3</sup> Errors were estimated based on measurements at multiple regions.

**Table S2.** Summary of the TGA data and the chemical composition of selected MgXACC samples.

| Samples  | Final pH    | Weight loss due<br>to bound water | Chemical composition                                                       |
|----------|-------------|-----------------------------------|----------------------------------------------------------------------------|
| Mg0.6ACC | 9.41 ± 0.05 | 9.7%                              | $\text{Mg}_{0.38}\text{Ca}_{0.62}\text{CO}_3 \cdot 0.56\text{H}_2\text{O}$ |
| Mg0.6ACC | 8.30 ± 0.03 | 10.6%                             | $\text{Mg}_{0.14}\text{Ca}_{0.86}\text{CO}_3 \cdot 0.64\text{H}_2\text{O}$ |
| Mg5ACC   | 9.56 ± 0.01 | 17.9%                             | $\text{Mg}_{0.81}\text{Ca}_{0.19}\text{CO}_3 \cdot 1.06\text{H}_2\text{O}$ |
| Mg5ACC   | 8.29 ± 0.08 | 15.1%                             | $\text{Mg}_{0.70}\text{Ca}_{0.30}\text{CO}_3 \cdot 0.88\text{H}_2\text{O}$ |

## 4. References

- 1 N. M. Szeverenyi, M. J. Sullivan and G. E. Maciel, *J. Magn. Reson.*, 1982, **47**, 462–475.
- 2 Bielecki, A. C. Kolbert, H. J. M. De Groot, R. G. Griffin and M. H. Levitt, *Adv. Magn. Reson.*, 1990, **14**, 111–124.
- 3 W.-Y. Chen, C.-I. Yang, C.-J. Lin, S.-J. Huang and J. C. C. Chan, *J. Phys. Chem. C*, 2014, **118**, 12022–12027.
- 4 C.-J. Lin, S.-Y. Yang, S.-J. Huang and J. C. C. Chan, *J. Phys. Chem. C*, 2015, **119**, 7225–7233.
- 5 T. W. T. Tsai and J. C. C. Chan, in *Annual Reports on NMR Spectroscopy*, Elsevier, 2011, vol. 73, pp. 1–61.
